# Supplementary material for: Patient engagement in research: a systematic review
Source: Springer Nature journal article supplement (doi:10.1186/1472-6963-14-89), 2014-02-26
Supplement: 12913_2013_3023_MOESM4_ESM.pdf [file 12913_2013_3023_MOESM4_ESM.pdf]

# Patient engagement in healthcare research

Question 1.

What is the best method to identify and select patients for engagement?

Question 2.

How to best engage patients?  
-Timing (stage of research)  
-Methods of engagement

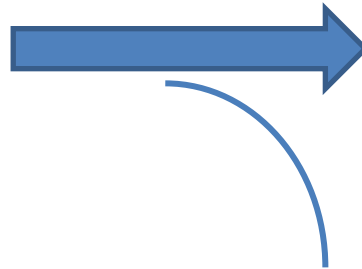

Question 3.

What are the benefits of engagement (changes in study design, higher enrollment, etc.)

Question 4.

What are the harms/barriers?
