# Supplementary material for: Patient engagement in research: a systematic review
Source: Springer Nature journal article supplement (doi:10.1186/1472-6963-14-89), 2014-02-26

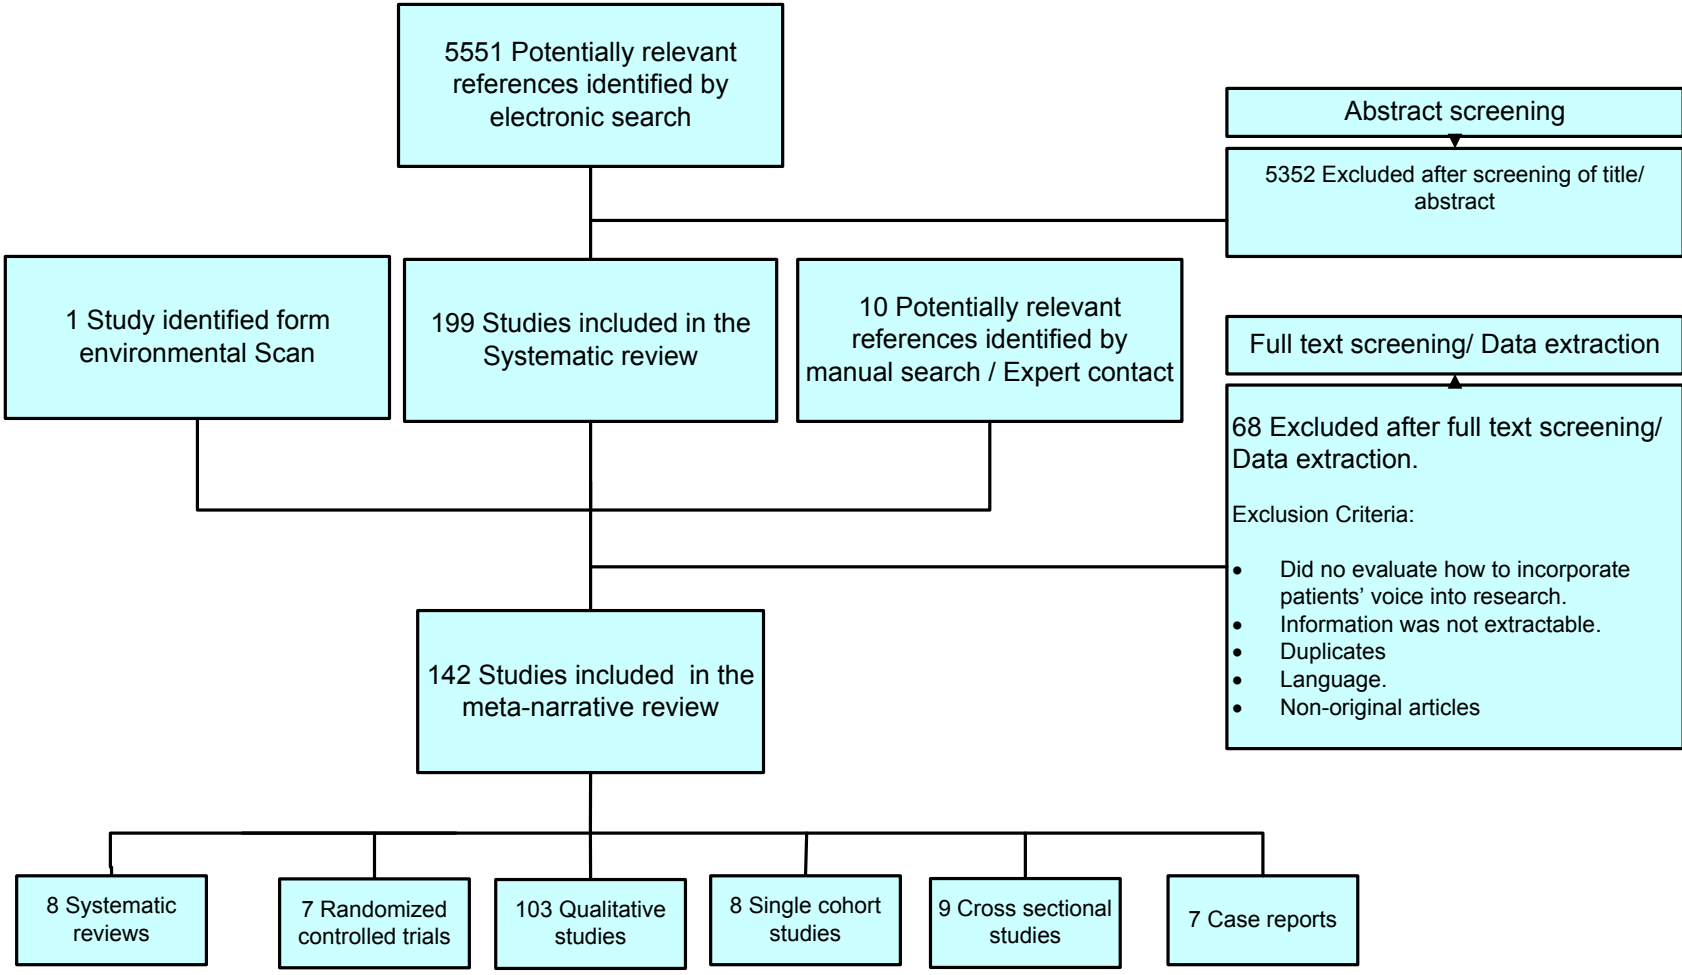

Supplement: 12913_2013_3023_MOESM5_ESM.pdf [file 12913_2013_3023_MOESM5_ESM.pdf]
