# Supplementary material for: Patient engagement in research: a systematic review
Source: Springer Nature journal article supplement (doi:10.1186/1472-6963-14-89), 2014-02-26
Supplement: 12913_2013_3023_MOESM6_ESM.pdf [file 12913_2013_3023_MOESM6_ESM.pdf]

# No. studies

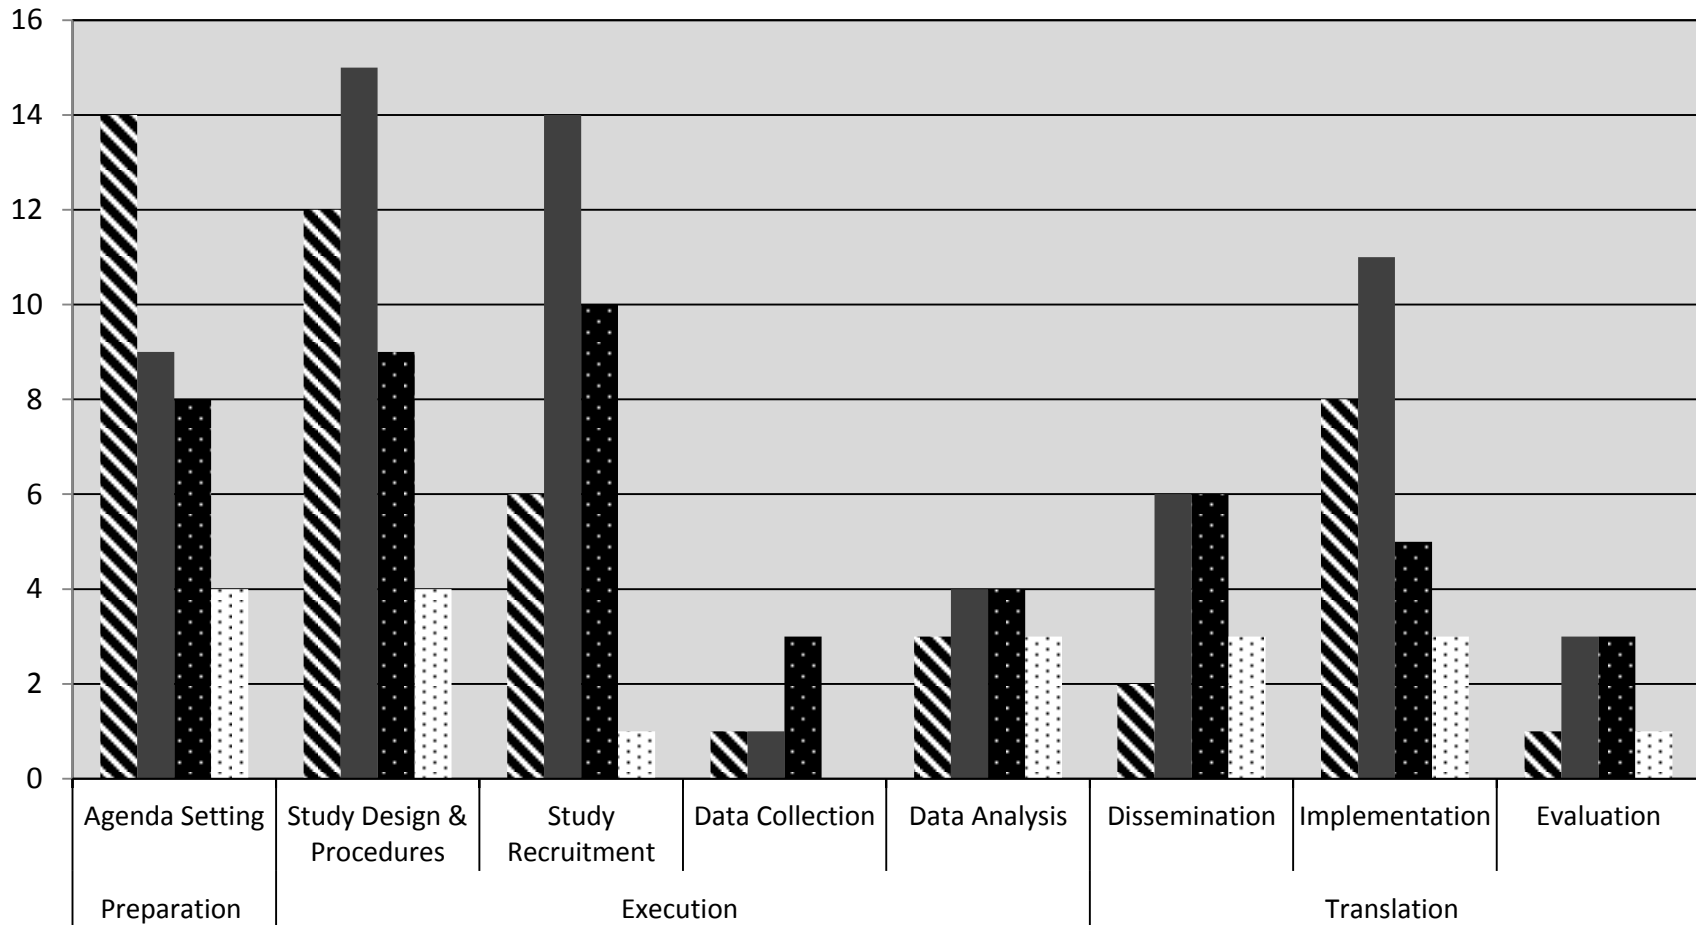

▨ Focus Group   ■ Interview   ■ Survey   ▨ Deliberation/Organizational participation
